# Supplementary material
Source: PubMed Central journal article supplement (PMC3318122)
Supplement: mmc1.pdf [file mmc1.pdf]

# Supplementary Material S1 to Mass Transfer Enhancement in Moving Biofilm Structures

Danial Taherzadeh<sup>1</sup>  
Institute of Water Quality Control,  
Technische Universität München, Garching, Germany

Cristian Picioreanu  
Environmental Biotechnology Group, Department of Biotechnology,  
Delft University of Technology, Delft, The Netherlands

Harald Horn  
Engler-Bunte-Institut, Chair of Water Chemistry,  
Karlsruhe Institute of Technology, Karlsruhe, Germany

<sup>1</sup>Corresponding author. Address: Oncolead GmbH & Co. KG, Fraunhoferstrasse 20, D-82152, Planegg, Germany; Email: danial.taherzadeh@oncolead.com; Tel.: +49 (89) 380122150.

## Model equations, dimensionless numbers and notations

The dimensionless model equations result by scaling each dimensional quantity with some characteristic value:

- space can be scaled with a characteristic length  $L_0$  (for example, the biofilm head diameter  $d$  or an equivalent hydraulic diameter  $4A_B/P_B$ ) and time with a conveniently chosen characteristic time  $t_0$  (for example, the inverse of a streamer characteristic vibration frequency)

$$x^* = \frac{x}{L_0} \quad y^* = \frac{y}{L_0} \quad t^* = \frac{t}{t_0}$$

- velocities, displacement, stresses and concentrations are scaled with the inlet flow velocity, characteristic length, Young modulus and inlet solute concentration, respectively. The pressure is made dimensionless on the viscous scale:

$$\mathbf{u}^* = \frac{\mathbf{u}}{u_0} \quad p^* = \frac{L_0 p}{\mu_F u_0} \quad \mathbf{d}^* = \frac{\mathbf{d}}{L_0} \quad \mathbf{S}^* = \frac{\mathbf{S}}{E} \quad c_F^* = \frac{c_F}{c_0} \quad c_B^* = \frac{c_B}{c_0}$$

In tables [S1.1](#), [S1.2](#), [S1.3](#) and [S1.4](#) the complete formulation of fluid-structure interaction and substrate transport and uptake in biofilm streamers are introduced in both dimensional and also non-dimensional forms. As a result of scaling the model equations, a few dimensionless numbers appear which are listed in Table [S1.5](#).

Table S1.1: Dimensional and non-dimensional forms of fluid dynamics equations solved on the moving mesh frame with spatial coordinates  $\chi$ .

| Scope                | Dimensional equations                                                                                                                                                                                                                                                                                              | Dimensionless equations                                                                                                                                                                                                    |
|----------------------|--------------------------------------------------------------------------------------------------------------------------------------------------------------------------------------------------------------------------------------------------------------------------------------------------------------------|----------------------------------------------------------------------------------------------------------------------------------------------------------------------------------------------------------------------------|
| $\Omega_F$           | Incompressible unsteady laminar flow.<br>$\rho_F \left( \frac{\partial \mathbf{u}}{\partial t} + (\mathbf{u} - \mathbf{u}_G) \cdot \nabla \mathbf{u} \right) = -\nabla p + \mu_F \nabla^2 \mathbf{u}$ $\nabla \cdot \mathbf{u} = 0$ Initial condition: the steady-state solution<br>$\mathbf{u} = \mathbf{u}_{st}$ | $St Re \frac{\partial \mathbf{u}^*}{\partial t^*} + Re (\mathbf{u}^* - \mathbf{u}_G^*) \cdot \nabla \mathbf{u}^* = -\nabla p^* + \nabla^2 \mathbf{u}^*$ $\nabla \cdot \mathbf{u}^* = 0$ $\mathbf{u}^* = \mathbf{u}_{st}^*$ |
| $\Gamma_I$           | Uniform inlet velocity<br>$u_x = u_0, \quad u_y = 0$                                                                                                                                                                                                                                                               | $u_x^* = 1, \quad u_y^* = 0$                                                                                                                                                                                               |
| $\Gamma_U, \Gamma_L$ | Slip condition<br>$\partial u_x / \partial y = 0, \quad u_y = 0$                                                                                                                                                                                                                                                   | $\partial u_x^* / \partial y^* = 0, \quad u_y^* = 0$                                                                                                                                                                       |
| $\Gamma_O$           | No viscous forces and fixed zero pressure<br>$\partial u_x / \partial y + \partial u_y / \partial x = 0, \quad p = 0$                                                                                                                                                                                              | $\partial u_x^* / \partial y^* + \partial u_y^* / \partial x^* = 0, \quad p^* = 0$                                                                                                                                         |
| $\Gamma_H$           | Non-slip condition<br>$\mathbf{u} = 0$                                                                                                                                                                                                                                                                             | $\mathbf{u}^* = 0$                                                                                                                                                                                                         |
| $\Gamma_{FSI}$       | Fluid velocity equals the biofilm deformation rate<br>$\mathbf{u} = \frac{d\mathbf{d}}{dt}$                                                                                                                                                                                                                        | $\mathbf{u}^* = St \frac{d\mathbf{d}^*}{dt^*}$                                                                                                                                                                             |

Table S1.2: Dimensional and non-dimensional forms of biofilm elastodynamics equations solved on the Lagrangian coordinate system  $\mathbf{X}$  associated with the material points.

| Scope                | Dimensional equations                                                                                                                                                                                                                                                                                                                                                                                                                                                                                                        | Dimensionless equations                                                                                                                                                                                                                                                                                       |
|----------------------|------------------------------------------------------------------------------------------------------------------------------------------------------------------------------------------------------------------------------------------------------------------------------------------------------------------------------------------------------------------------------------------------------------------------------------------------------------------------------------------------------------------------------|---------------------------------------------------------------------------------------------------------------------------------------------------------------------------------------------------------------------------------------------------------------------------------------------------------------|
| $\Omega_B$           | Geometrically nonlinear isotropically elastic material<br>$\rho_B \frac{d^2 \mathbf{d}}{dt^2} = \nabla \cdot (\mathbf{S} \cdot \mathbf{F})$ $\mathbf{S} = \frac{E\nu}{(1+\nu_B)(1-2\nu_B)} \text{tr} \mathbf{E} \mathbf{I} + \frac{E}{(1+\nu_B)} \mathbf{E}$ $\mathbf{E} = \frac{1}{2} (\mathbf{F}^T \mathbf{F} - \mathbf{I}), \quad \mathbf{F} = \mathbf{I} + \nabla \mathbf{d}$ <p>Initial condition: static system with no displacement and zero displacement rate</p> $\mathbf{d} = 0, \quad \frac{d\mathbf{d}}{dt} = 0$ | $St^2 Re Q \left( \frac{\rho_F}{\rho_B} \right) \frac{d^2 \mathbf{d}^*}{dt^{*2}} = \nabla \cdot (\mathbf{S}^* \cdot \mathbf{F})$ $\mathbf{S}^* = \frac{\nu_B}{(1+\nu_B)(1-2\nu_B)} \text{tr} \mathbf{E} \mathbf{I} + \frac{1}{(1+\nu_B)} \mathbf{E}$ $\mathbf{d}^* = 0, \quad \frac{d\mathbf{d}^*}{dt^*} = 0$ |
| $\Omega_H, \Gamma_H$ | No displacement<br>$\mathbf{d} = 0$                                                                                                                                                                                                                                                                                                                                                                                                                                                                                          | $\mathbf{d}^* = 0$                                                                                                                                                                                                                                                                                            |
| $\Gamma_{FSI}$       | Dynamic continuity of stresses in biofilm and fluid<br>$\mathbf{n} \cdot \boldsymbol{\sigma} = \mathbf{n} \cdot [p \mathbf{I} + \mu_F \nabla \mathbf{u} + \mu_F (\nabla \mathbf{u})^T] \frac{dv}{dV}$                                                                                                                                                                                                                                                                                                                        | $\mathbf{n} \cdot \boldsymbol{\sigma}^* = \mathbf{n} \cdot \left\{ Q [p^* \mathbf{I} + \nabla \mathbf{u}^* + (\nabla \mathbf{u}^*)^T] \right\} \frac{dv^*}{dV^*}$                                                                                                                                             |

Table S1.3: Dimensional and non-dimensional forms of solute transport in fluid equations solved on the moving mesh frame with spatial coordinates  $\boldsymbol{\chi}$ .

| Scope                    | Dimensional equations                                                                                                                                                                                                                        | Dimensionless equations                                                                                                                   |
|--------------------------|----------------------------------------------------------------------------------------------------------------------------------------------------------------------------------------------------------------------------------------------|-------------------------------------------------------------------------------------------------------------------------------------------|
| $\Omega_F$               | Unsteady convection and diffusion of a dilute solute<br>$\frac{\partial c_F}{\partial t} = -(\mathbf{u} - \mathbf{u}_G) \cdot \nabla c_F + \nabla \cdot (D \nabla c_F)$ <p>Initial condition: the steady-state solution</p> $c_F = c_{F,st}$ | $St Pe \frac{\partial c_F^*}{\partial t^*} + Pe (\mathbf{u}^* - \mathbf{u}_G^*) \cdot \nabla c_F^* = \nabla^2 c_F^*$ $c_F^* = c_{F,st}^*$ |
| $\Gamma_I$               | Constant concentration<br>$c_F = c_0$                                                                                                                                                                                                        | $c_F^* = 1$                                                                                                                               |
| $\Gamma_U, \Gamma_L$     | Insulation<br>$\partial c_F / \partial y = 0$                                                                                                                                                                                                | $\partial c_F^* / \partial y^* = 0$                                                                                                       |
| $\Gamma_O$               | No diffusion<br>$\partial c_F / \partial x = 0$                                                                                                                                                                                              | $\partial c_F^* / \partial x^* = 0$                                                                                                       |
| $\Gamma_H, \Gamma_{FSI}$ | Flux continuity<br>$\partial c_F / \partial n = \partial c_B / \partial n$                                                                                                                                                                   | $\partial c_F^* / \partial n^* = \partial c_B^* / \partial n^*$                                                                           |

Table S1.4: Dimensional and non-dimensional forms of solute transport and reaction in biofilm equations solved on the Lagrangian coordinate system  $\mathbf{X}$  associated with the material points.

| Scope                    | Dimensional equations                                                                                                                                                                                               | Dimensionless equations                                                                                               |
|--------------------------|---------------------------------------------------------------------------------------------------------------------------------------------------------------------------------------------------------------------|-----------------------------------------------------------------------------------------------------------------------|
| $\Omega_B$               | Unsteady diffusion and nonlinear (Monod) reaction for a dilute solute<br>$\frac{\partial c_B}{\partial t} = D\nabla^2 c_B + k \frac{c_B}{K + c_B}$ Initial condition: the steady-state solution<br>$c_B = c_{B,st}$ | $St Pe \frac{\partial c_B^*}{\partial t^*} = \nabla^2 c_B^* + \Phi^2 \frac{c_B^*}{M + c_B^*}$<br>$c_B^* = c_{B,st}^*$ |
| $\Gamma_H, \Gamma_{FSI}$ | Continuity of solute concentration<br>$c_B = c_F$                                                                                                                                                                   | $c_B^* = c_F^*$                                                                                                       |

Table S1.5: Summary of dimensionless numbers

| Dimensionless form                                                                                                                                                                                   | Name                       |
|------------------------------------------------------------------------------------------------------------------------------------------------------------------------------------------------------|----------------------------|
| <i>1. Fluid dynamics</i>                                                                                                                                                                             |                            |
| $Re = \frac{L_0 u_0 \rho_F}{\mu_F}$                                                                                                                                                                  | Reynolds number            |
| $St = \frac{L_0}{t_0 u_0}$                                                                                                                                                                           | Strouhal number            |
| <i>2. Biofilm Elastodynamics</i>                                                                                                                                                                     |                            |
| $Q = \frac{u_0 \mu_F}{E_B L_0}$                                                                                                                                                                      | FSI number                 |
| $\tau_E^2 = \frac{\rho_B L_0^2}{E_B t_0^2} = \frac{t_{0,E}^2}{t_0^2} = St^2 Re \left( \frac{\rho_F}{\rho_B} \right) Q$                                                                               | FSI time scale (squared)   |
| <i>3. Solute mass transport in fluid and biofilm</i>                                                                                                                                                 |                            |
| $Pe = \frac{u_0 L_0}{D}$                                                                                                                                                                             | Péclet number              |
| $\Phi^2 = \frac{k L_0^2}{D c_0}$                                                                                                                                                                     | Thiele number (squared)    |
| $M = \frac{K}{c_0}$                                                                                                                                                                                  | Dimensionless Monod number |
| $\tau_D = \frac{L_0^2 / D}{t_0} = \frac{t_{0,D}}{t_0} = St Pe$                                                                                                                                       | Mass transport time scale  |
| In addition, when considering the mass transfer in the liquid boundary layer adjacent to the biofilm, from $k_m(c - c_0) = D \partial c / \partial n _{\Gamma}$ a Sherwood number can be defined as: | Sherwood number            |
| $Sh = \frac{k_m L_0}{D} = \frac{L_0 \frac{\partial c}{\partial n} _{\Gamma}}{c - c_0}$                                                                                                               |                            |
| Usually, $Sh$ is correlated with $Re$ and $Sc$ (Schmidt) numbers, where                                                                                                                              | Schmidt number             |
| $Sc = \frac{\mu_F}{\rho_F D}$                                                                                                                                                                        |                            |

## Nomenclature

| Symbol                               | Description                                                     | Units                                                |
|--------------------------------------|-----------------------------------------------------------------|------------------------------------------------------|
| <i>Subdomains and boundaries</i>     |                                                                 |                                                      |
| $\Omega_F$                           | Fluid subdomain                                                 |                                                      |
| $\Omega_B$                           | Biofilm subdomain                                               |                                                      |
| $\Gamma_I$                           | Inlet boundary                                                  |                                                      |
| $\Gamma_O$                           | Outlet boundary                                                 |                                                      |
| $\Gamma_U$                           | Upper wall boundary                                             |                                                      |
| $\Gamma_L$                           | Lower wall boundary                                             |                                                      |
| $\Gamma_H$                           | Biofilm head boundary                                           |                                                      |
| $\Gamma_{FSI}$                       | Biofilm tail boundary<br>(Fluid-Structure Interaction boundary) |                                                      |
| <i>Model variables and constants</i> |                                                                 |                                                      |
| $c_0$                                | Solute concentration in inlet                                   | $\text{mol} \cdot \text{m}^{-3}$                     |
| $c_B$                                | Solute concentration in biofilm                                 | $\text{mol} \cdot \text{m}^{-3}$                     |
| $c_F$                                | Solute concentration in fluid                                   | $\text{mol} \cdot \text{m}^{-3}$                     |
| $\mathbf{d}$                         | Biofilm displacement                                            | m                                                    |
| $D$                                  | Solute diffusion coefficient                                    | $\text{m} \cdot \text{s}^{-2}$                       |
| $E_B$                                | Biofilm Young's modulus                                         | $\text{kg} \cdot \text{m}^{-1} \cdot \text{s}^{-2}$  |
| $\mathbf{E}$                         | Green-Lagrangian strains                                        | -                                                    |
| $\mathbf{F}$                         | Deformation gradient                                            | -                                                    |
| $\mathbf{I}$                         | Identity matrix                                                 | -                                                    |
| $k$                                  | Reaction rate constant                                          | $\text{mol} \cdot \text{m}^{-3} \cdot \text{s}^{-1}$ |
| $k_m$                                | Mass transfer coefficient                                       | $\text{m} \cdot \text{s}^{-1}$                       |
| $K$                                  | Monod saturation coefficient                                    | $\text{mol} \cdot \text{m}^{-3}$                     |
| $L_0$                                | Characteristic length                                           | m                                                    |
| $n$                                  | Direction normal to boundary                                    | m                                                    |
| $\mathbf{n}$                         | Vector normal to boundary                                       | m                                                    |
| $p$                                  | Fluid pressure                                                  | $\text{kg} \cdot \text{m}^{-1} \cdot \text{s}^{-2}$  |
| $\mathbf{S}$                         | Second Piola-Kirchhoff stress tensor                            | $\text{kg} \cdot \text{m}^{-1} \cdot \text{s}^{-2}$  |
| $t$                                  | Time                                                            | s                                                    |

| Symbol              | Description                                                         | Units                                               |
|---------------------|---------------------------------------------------------------------|-----------------------------------------------------|
| $t_0$               | Characteristic time                                                 | s                                                   |
| $t_{0,D}$           | Characteristic time for diffusion                                   | s                                                   |
| $u_x, u_y$          | Fluid velocity components                                           | $\text{m} \cdot \text{s}^{-1}$                      |
| $\mathbf{u}$        | Fluid velocity                                                      | $\text{m} \cdot \text{s}^{-1}$                      |
| $\mathbf{u}_G$      | Mesh velocity                                                       | $\text{m} \cdot \text{s}^{-1}$                      |
| $v$                 | Volume in spatial frame                                             | $\text{m}^3$                                        |
| $V$                 | Volume in material frame                                            | $\text{m}^3$                                        |
| $x, y$              | Spatial coordinates                                                 | m                                                   |
| $\mathbf{X}$        | Material coordinates<br>(Lagrangian frame, reference configuration) | m                                                   |
| $\mu_F$             | Fluid dynamic viscosity                                             | $\text{kg} \cdot \text{m}^{-1} \cdot \text{s}^{-1}$ |
| $\nu_B$             | Poisson's ratio biofilm material                                    | -                                                   |
| $\rho_F$            | Fluid density                                                       | $\text{kg} \cdot \text{m}^{-3}$                     |
| $\rho_B$            | Biofilm density                                                     | $\text{kg} \cdot \text{m}^{-3}$                     |
| $\sigma$            | Cauchy stress in the biofilm                                        | $\text{kg} \cdot \text{m}^{-1} \cdot \text{s}^{-2}$ |
| $\boldsymbol{\chi}$ | Spatial coordinates (moving mesh frame)                             | m                                                   |

*Characteristic dimensionless numbers*

|          |                             |   |
|----------|-----------------------------|---|
| $M$      | Dimensionless Monod number  | - |
| $Pe$     | Péclet number               | - |
| $Q$      | FSI number                  | - |
| $Re$     | Reynolds number             | - |
| $Sh$     | Sherwood number             | - |
| $St$     | Strouhal number             | - |
| $\Phi^2$ | Thiele number               | - |
| $\tau_E$ | FSI time scale              | - |
| $\tau_D$ | Solute diffusion time scale | - |
