# Supplementary material
Source: PubMed Central journal article supplement (PMC3318122)
Supplement: mmc2.pdf [file mmc2.pdf]

# Supplementary Material S2 to Mass Transfer Enhancement in Moving Biofilm Structures

Danial Taherzadeh<sup>1</sup>  
Institute of Water Quality Control,  
Technische Universität München, Garching, Germany

Cristian Picioreanu  
Environmental Biotechnology Group, Department of Biotechnology,  
Delft University of Technology, Delft, The Netherlands

Harald Horn  
Engler-Bunte-Institut, Chair of Water Chemistry,  
Karlsruhe Institute of Technology, Karlsruhe, Germany

<sup>1</sup>Corresponding author. Address: Oncolead GmbH & Co. KG, Fraunhoferstrasse 20, D-82152, Planegg, Germany; Email: danial.taherzadeh@oncolead.com; Tel.: +49 (89) 380122150.

## Effect of Decreased Solute Diffusivity in the Biofilm

In the model set up used throughout this study it has been assumed that the diffusion coefficient in the biofilm  $D_B$  is equal to that in the liquid,  $D$ . This assumption was made only for simplicity of the model analysis, as there is no further difficulty in model implementation when the diffusion coefficients are different in the  $\Omega_F$  and  $\Omega_B$  sub-domains. For low biofilm densities (10-20 kg dry weight/m<sup>3</sup> biofilm) a maximum of 50 % reduction in diffusivity is common for small molecules (such as oxygen) or elemental ions (Na<sup>+</sup>, Cl<sup>-</sup>, etc.), while for larger biofilm densities (20-35 kg dry weight/m<sup>3</sup> biofilm)  $D_B = 0.4D$  to  $0.8D$  (Horn and Morgenroth, 2006). Therefore, to test the influence of a reduced diffusion rate in the biofilm region, compared with the one in bulk liquid, we also conducted model runs with  $D_B = 0.5D$ .

The calculated overall Sherwood number was slightly larger when  $D_B = 0.5D$  than when  $D_B = D$ , both in static and in oscillatory biofilms (Fig. S2.1). The maximum relative increase in  $\overline{Sh}$  due to streamer movement was 11 % when  $D_B = D$  and 12 % for  $D_B = 0.5D$ . Since the calculated change in  $\overline{Sh}$  was very similar with or without 50 % decreased diffusion coefficient in the biofilm, we decided to simplify the model construction and, most importantly, the model analysis by studying only the case when  $D_B = D$ .

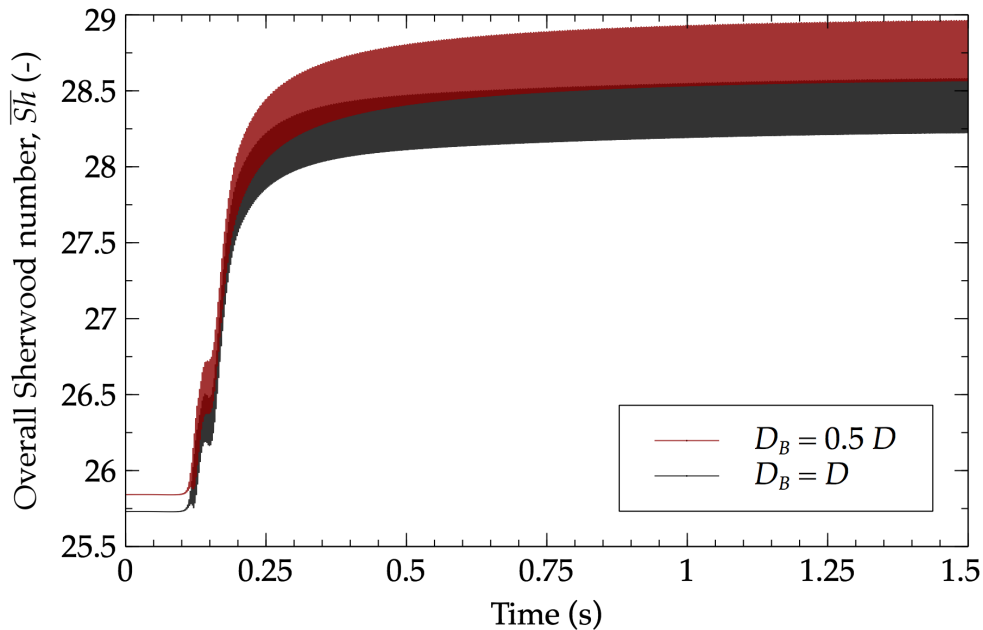

Figure S2.1: Change in the liquid-biofilm mass transfer of solute from static condition to steady oscillatory regime, as characterized by the overall Sherwood number  $\overline{Sh}$ . Black line: model results for equal solute diffusion coefficients in biofilm and liquid ( $D_B = D$ ); red line: model results for 50 % decreased solute diffusivity in the biofilm ( $D_B = 0.5D$ ). Simulations performed in standard conditions, with  $E_B = 4000$  Pa and  $u_0 = 0.4$  m  $\cdot$  s<sup>-1</sup>.

**Reference** Horn, H., and E. Morgenroth. 2006. Transport of oxygen, sodium chloride, and sodium nitrate in biofilms. *Chemical Engineering Science*. 61(5):1347-1356.
